# Supplementary material for: Prediction of fat mass from anthropometry at ages 7 to 9 years in Samoans: a cross-sectional study in the Ola Tuputupua’e cohort
Source: Springer Nature journal article supplement (doi:10.1038/s41430-022-01256-6), 2023-01-09
Supplement: 41430_2022_1256_MOESM10_ESM.pdf [file 41430_2022_1256_MOESM10_ESM.pdf]

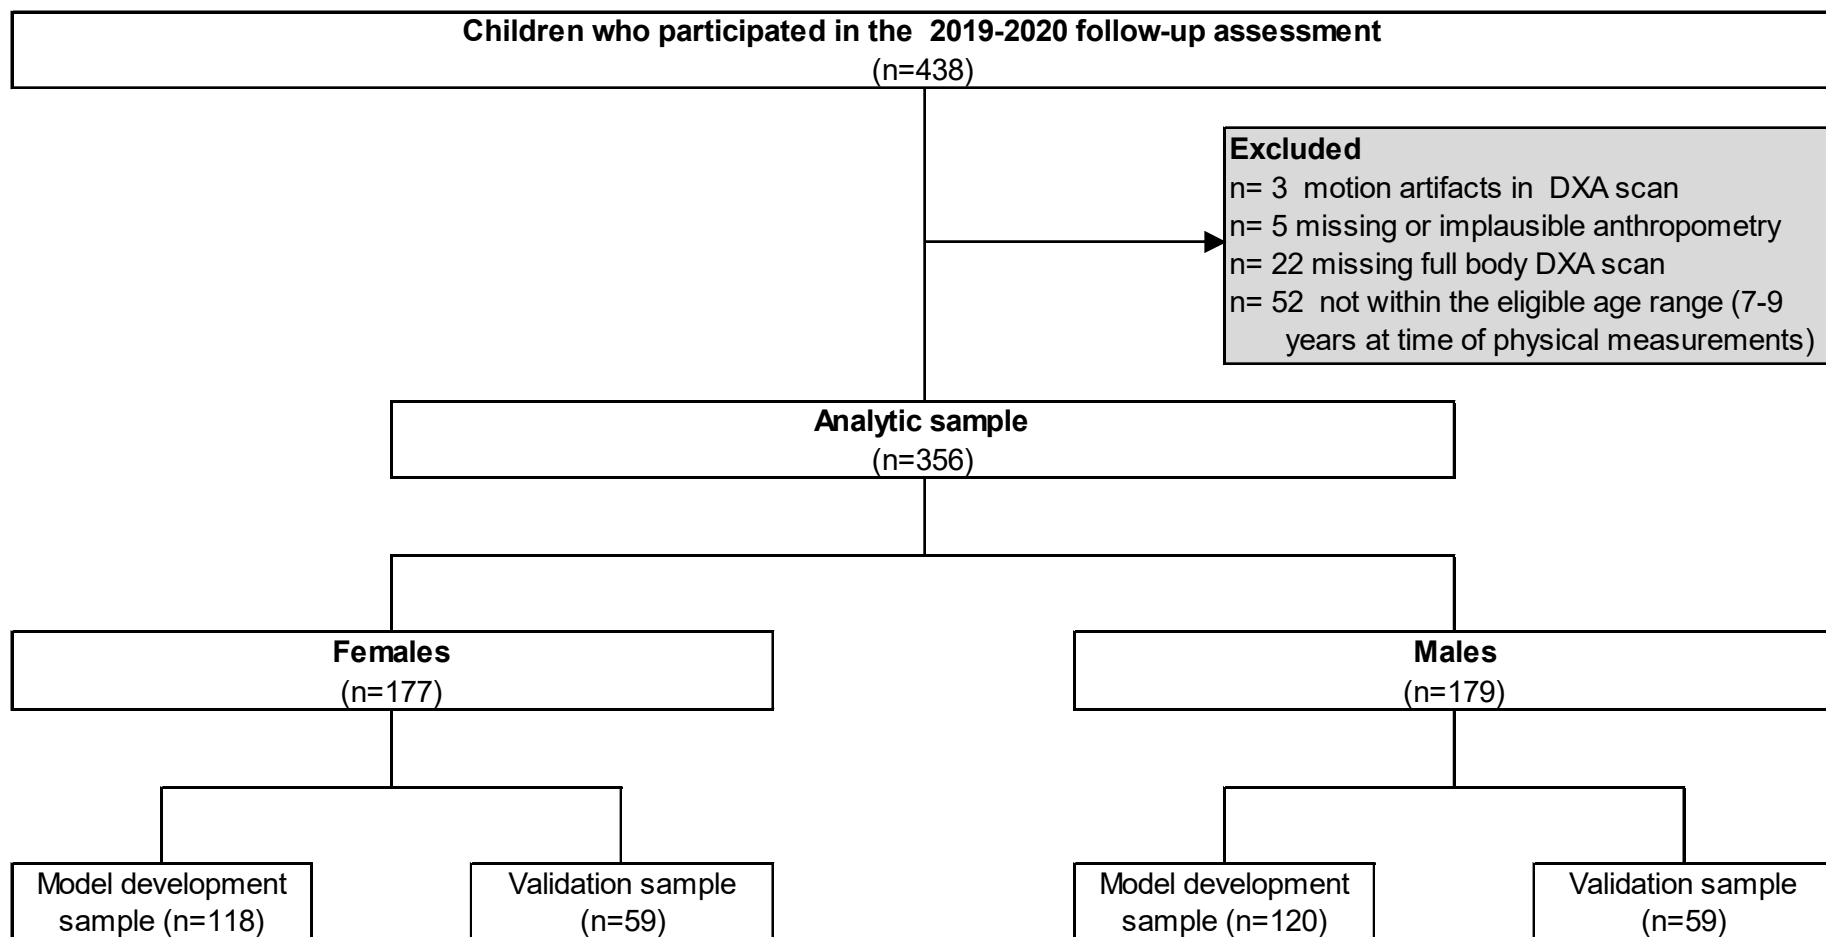

**Supplementary Figure 1. Sample selection flow chart, 2019-2020**

Of the 438 Samoan children who participated in the study, we excluded those with missing or implausible anthropometry data and dual x-ray absorptiometry (DXA) scans, were outside of the eligible age range (highlighted in gray). We used random sampling to select a model development sample and validation sample based on a 2:1 ratio.
