# Supplementary material for: Prediction of fat mass from anthropometry at ages 7 to 9 years in Samoans: a cross-sectional study in the Ola Tuputupua’e cohort
Source: Springer Nature journal article supplement (doi:10.1038/s41430-022-01256-6), 2023-01-09
Supplement: 41430_2022_1256_MOESM11_ESM.pdf [file 41430_2022_1256_MOESM11_ESM.pdf]

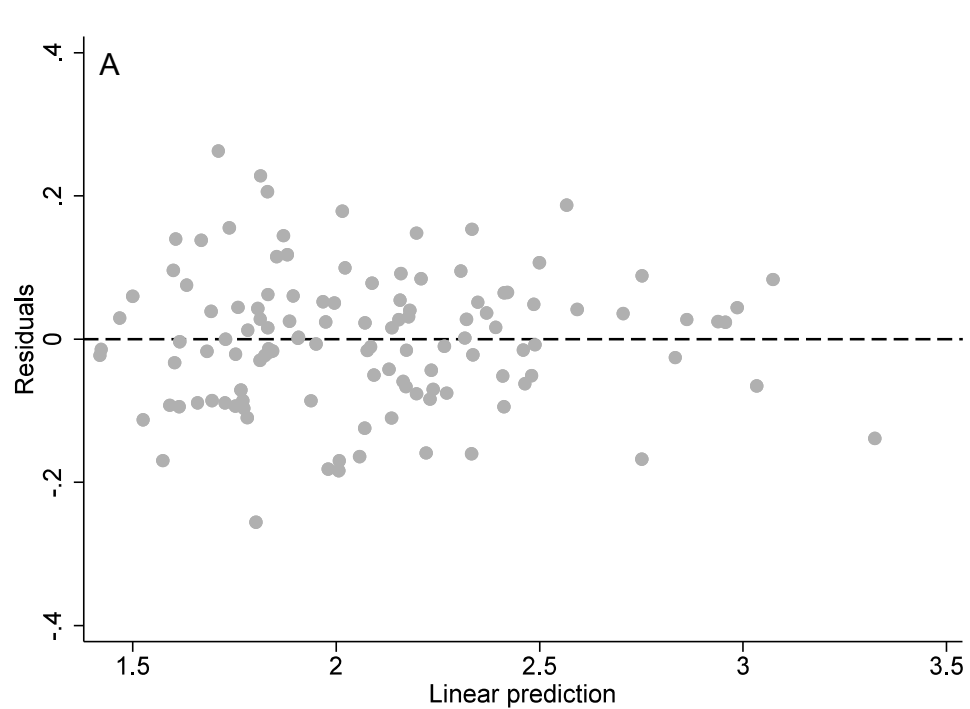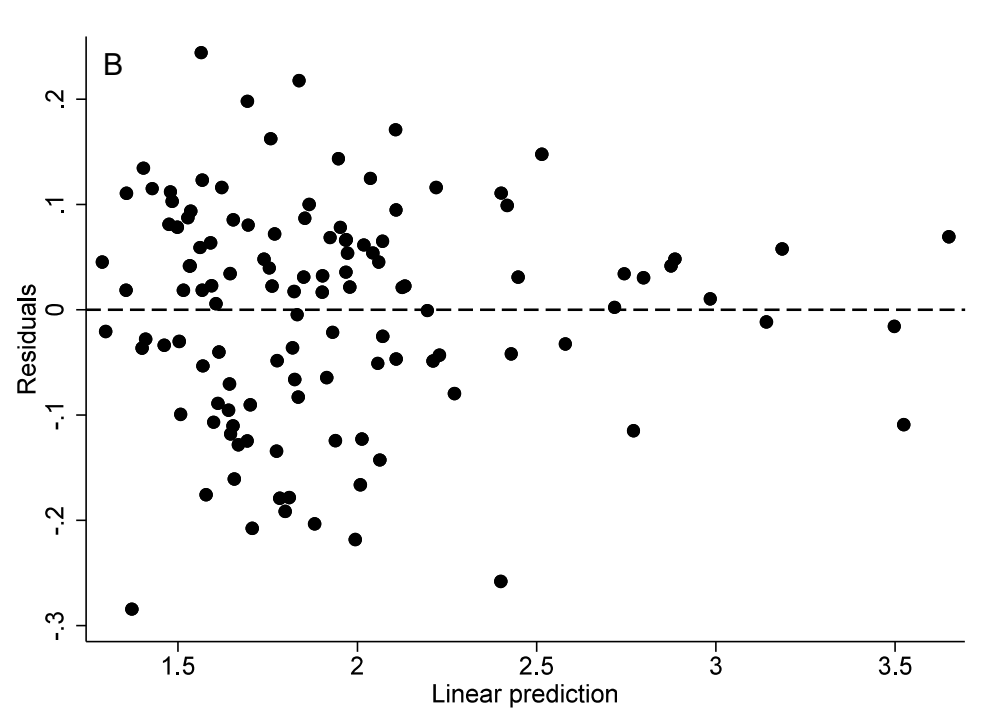

**Supplementary Figure 2. Final prediction regression model diagnostic plot of residuals versus linear predictions of  $\ln(\text{fat mass})$**

Dots represent (A) 118 females and (B) 120 males in the model development sample, respectively. The plots of residuals and linear predictions of natural log-transformed fat mass showed residuals randomly scattered around  $y=0$ , suggesting that the homoscedasticity assumption holds.
