# Supplementary material for: Prediction of fat mass from anthropometry at ages 7 to 9 years in Samoans: a cross-sectional study in the Ola Tuputupua’e cohort
Source: Springer Nature journal article supplement (doi:10.1038/s41430-022-01256-6), 2023-01-09
Supplement: 41430_2022_1256_MOESM12_ESM.pdf [file 41430_2022_1256_MOESM12_ESM.pdf]

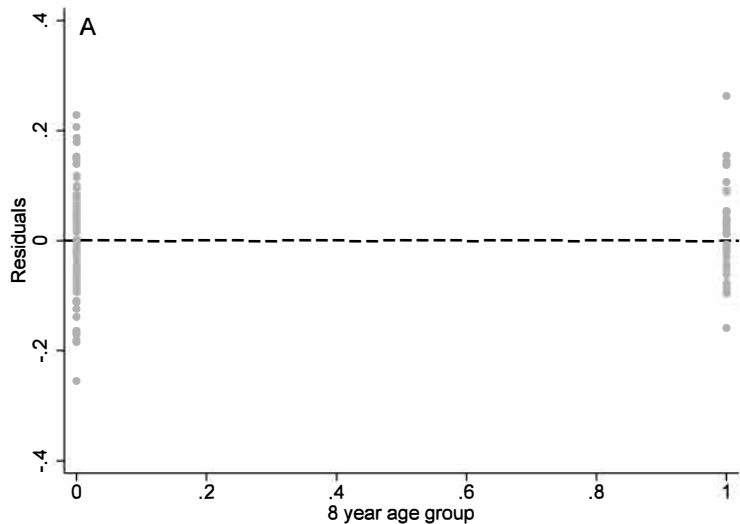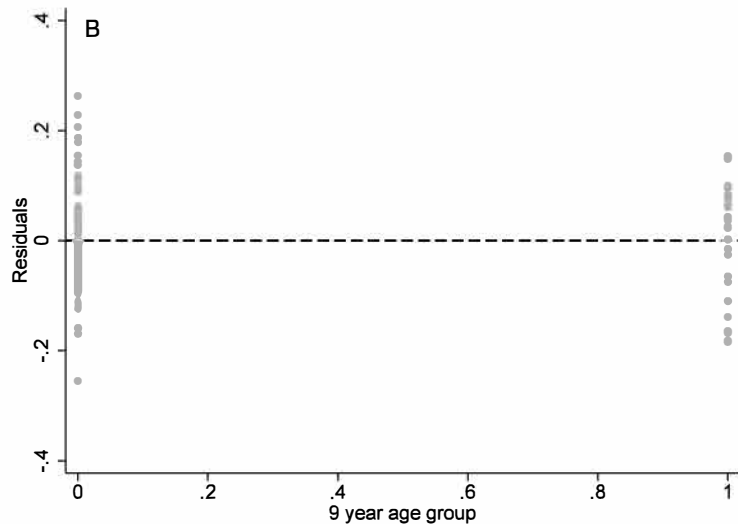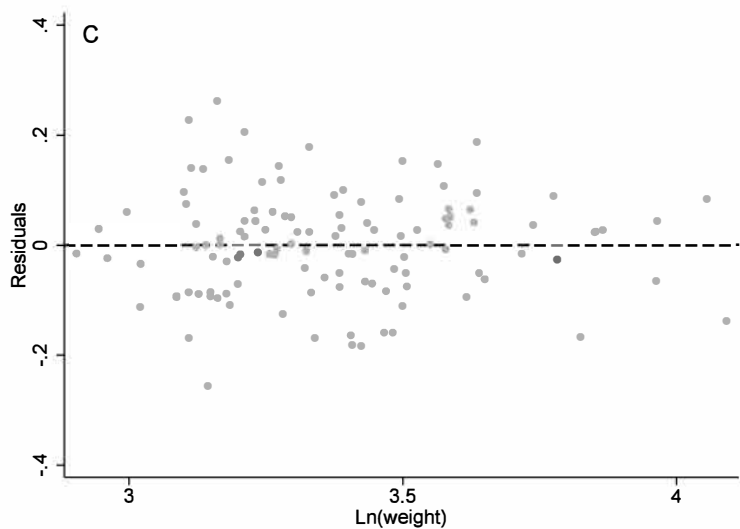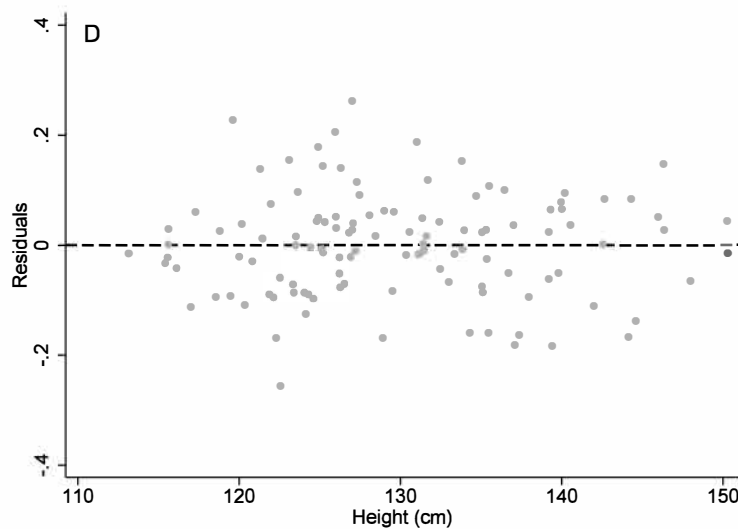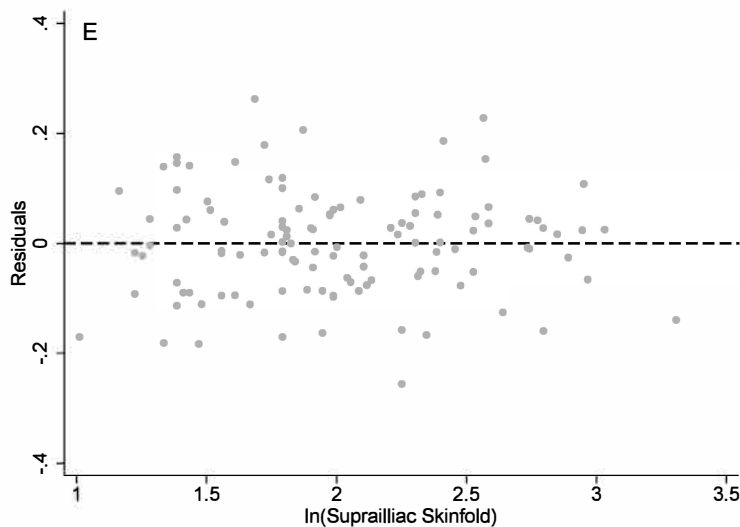

**Supplementary Figure 3. Final prediction regression model diagnostic plot of residuals versus linear predictions for covariates in the female model development sample (n=118)**

The residuals and linear predictions from the final model for ln(fat mass) in Samoan females are shown for (A-B) child age group, (C) weight, (D) height, and (E) log transformed suprailliac skinfold to assess model homoscedasticity.
