# Supplementary material for: Prediction of fat mass from anthropometry at ages 7 to 9 years in Samoans: a cross-sectional study in the Ola Tuputupua’e cohort
Source: Springer Nature journal article supplement (doi:10.1038/s41430-022-01256-6), 2023-01-09
Supplement: 41430_2022_1256_MOESM13_ESM.pdf [file 41430_2022_1256_MOESM13_ESM.pdf]

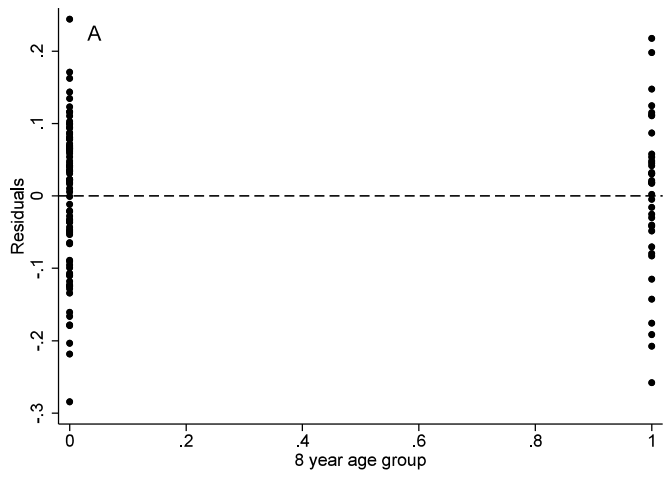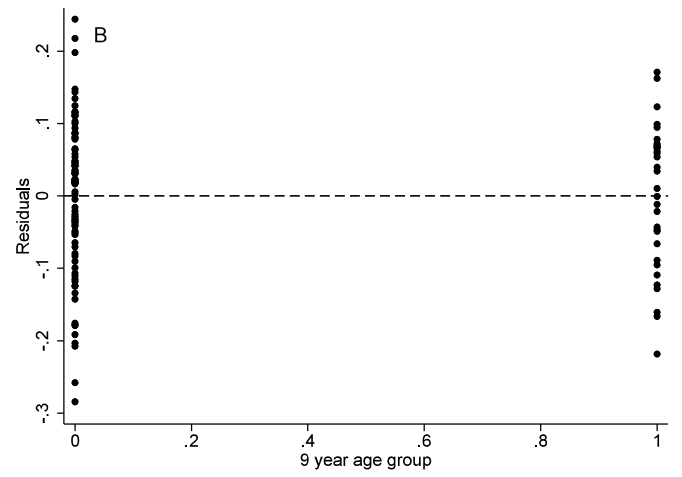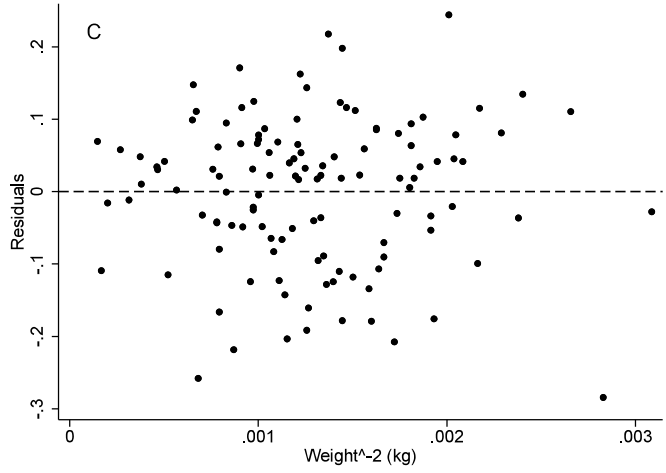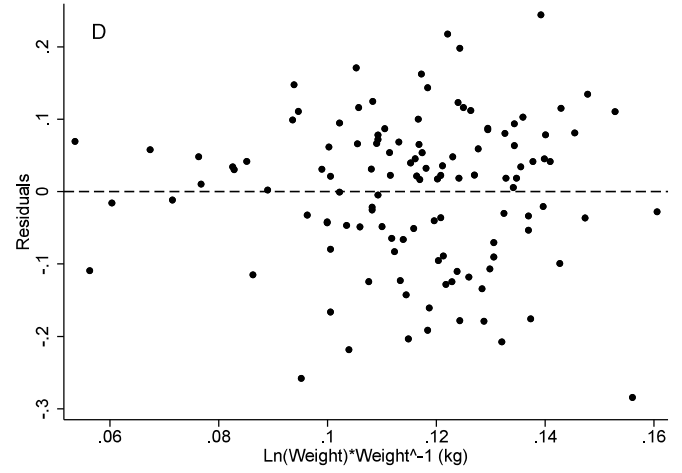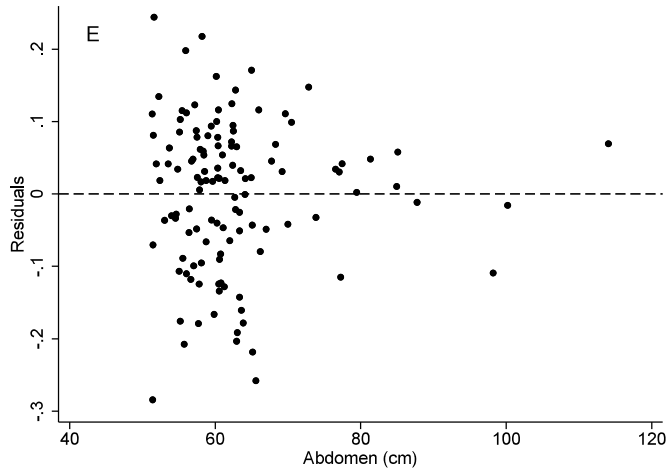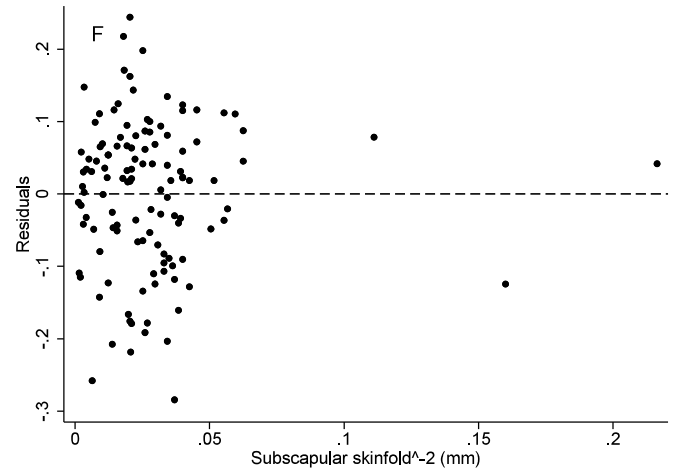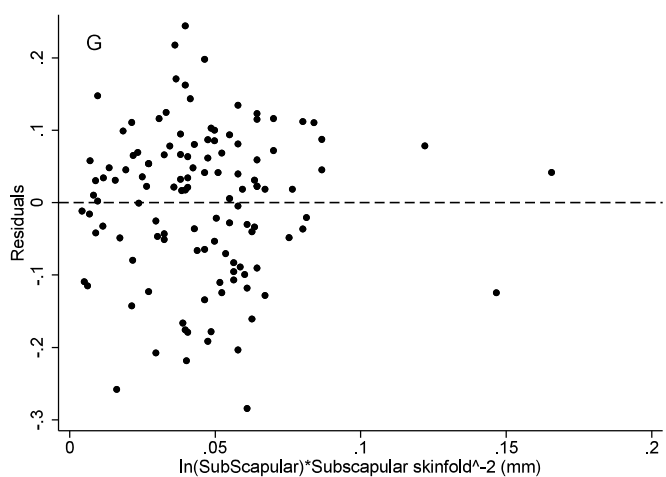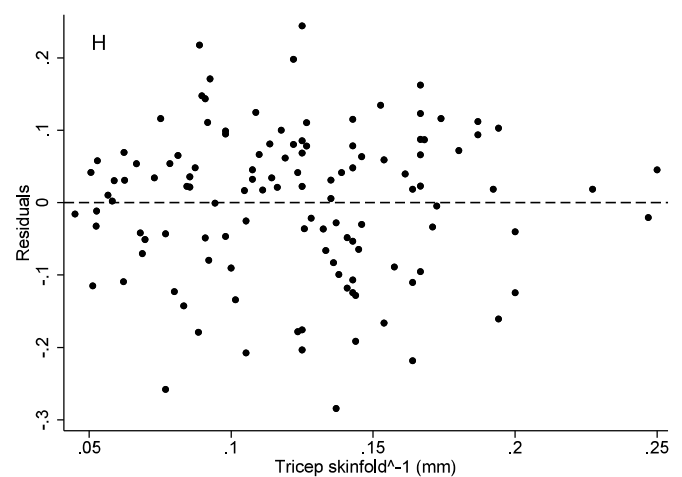

**Supplementary Figure 4. Final prediction regression model diagnostic plot of residuals versus linear predictions for covariates in the male model development sample (n=120)**

The residuals and linear predictions from the final model for  $\ln(\text{fat mass})$  in Samoan males are shown for (A-B) child age group, (C-D) weight, (E) abdominal circumference, and (F-H) skinfold thicknesses to assess model homoscedasticity.
